# Supplementary material
Source: PubMed Central journal article supplement (PMC7792657)
Supplement: CJN.09070620SupplementaryData.pdf [file CJN.09070620SupplementaryData.pdf]

## **Supplemental Material**

Supplemental Item 1. Survey items from the 2018 Global Kidney Health Atlas relating to Conservative Kidney Management (conservative kidney management).

Supplemental Table 1. Availability of kidney replacement therapies, and funding sources, among countries offering conservative kidney management.

Supplemental Table 2. Number of quality indicators of conservative kidney management delivery reported overall and by country income level.

**Supplemental Item 1.** Survey items from the 2018 Global Kidney Health Atlas relating to Conservative Kidney Management (CKM).

## **C6. Conservative care**

***Conservative (non-dialytic) kidney care:*** Comprehensive conservative care is defined as planned, holistic, patient-centred care for patients with CKD stage 5, according to *Kidney Disease: Improving Global Outcomes (KDIGO)*. ***This is appropriate for patients who choose not to initiate RRT or in whom resource constraints prevent or limit access to RRT.***

We would like to know more about the capacity to deliver conservative care in your country (that is, capacity to support/manage patients who will not receive RRT despite being in kidney failure). The goals of conservative care are usually to optimize quality of life, manage symptoms of kidney failure, and when appropriate, preserve residual renal function in patients with advanced CKD (CKD stage 5).

**C6.1. Considering the definition above, is conservative care available in your country?**

- Yes
- No
- Unknown

**C6.2 Please indicate the availability of a system for conservative care (holistic patient-centred care for patients with CKD stage 5) that includes all or any of the following:**

**'Generally available' means: in 50% or more centres (hospitals or clinics) and 'Generally not available' means: in less than 50% of centres (hospitals or clinics).**

**If conservative care is NOT available in your country, select N/A.**

|                                                                                                                                                                                 | Generally available | Generally not available | Never | Unknown | N/A |
|---------------------------------------------------------------------------------------------------------------------------------------------------------------------------------|---------------------|-------------------------|-------|---------|-----|
| C6.2.1 Established choice-restricted conservative care (conservative care for patients in whom resource constraints prevent or limit access to RRT)                             |                     |                         |       |         |     |
| C6.2.2 Established conservative care that is chosen or medically advised (conservative care program for patients who opted not to have dialysis, where it is readily available) |                     |                         |       |         |     |
| C6.2.3 Multidisciplinary team approach to care via shared decision making                                                                                                       |                     |                         |       |         |     |
| C6.2.4 Shared decision-making tools for patients and providers; for example, practice guidelines for providers, patient decision aids                                           |                     |                         |       |         |     |
| C6.2.5 Systematic active recognition and management of symptoms associated with advanced kidney failure                                                                         |                     |                         |       |         |     |
| C6.2.6 Systematic provision of psychological, cultural, and spiritual support                                                                                                   |                     |                         |       |         |     |
| C6.2.7 Systematic provision to care providers of additional training in conservative care                                                                                       |                     |                         |       |         |     |
| C6.2.8 Easy access to conservative care across settings (for example, home, hospital, hospice, and nursing home)                                                                |                     |                         |       |         |     |

**Supplemental Table 1.** Availability of kidney replacement therapies, and funding sources, among countries offering conservative kidney management.

| <b>ISN Region</b> | <b>Country</b>   | <b>World Bank income group</b> | <b>Hemodialysis</b> | <b>Peritoneal Dialysis</b> | <b>Kidney Transplantation</b> | <b>KRT Funding</b>   |
|-------------------|------------------|--------------------------------|---------------------|----------------------------|-------------------------------|----------------------|
| Africa            | Algeria          | Upper-middle                   | ✓                   | ✓                          | ✓                             | Govt (no fees)       |
|                   | Angola           | Upper-middle                   | ✓                   | ✓                          | X                             | Govt (no fees)       |
|                   | Benin            | Low                            | ✓                   | ✓                          | X                             | Govt (no fees)       |
|                   | Burkina Faso     | Low                            | ✓                   | X                          | X                             | Govt (some fees)     |
|                   | Burundi          | Low                            | ✓                   | X                          | X                             | Mix (govt + private) |
|                   | Cabo Verde       | Lower-middle                   | ✓                   | X                          | X                             | Govt (no fees)       |
|                   | Cameroon         | Lower-middle                   | ✓                   | X                          | X                             | Govt (some fees)     |
|                   | Chad             | Low                            | ✓                   | X                          | X                             | Govt (no fees)       |
|                   | Congo, Dem. Rep. | Low                            | ✓                   | ✓                          | X                             | Mix (govt + private) |
|                   | Congo, Rep.      | Lower-middle                   | ✓                   | ✓                          | X                             | Govt (no fees)       |
|                   | Cote d'Ivoire    | Lower-middle                   | ✓                   | ✓                          | ✓                             | Mix (govt + private) |

|                  |              |   |   |   |                      |
|------------------|--------------|---|---|---|----------------------|
| Egypt, Arab Rep. | Lower-middle | ✓ | ✓ | ✓ | Govt (no fees)       |
| Eritrea          | Low          | ✓ | X | X | Govt (some fees)     |
| Gabon            | Upper-middle | ✓ | X | X | Govt (some fees)     |
| Gambia, The      | Low          | ✓ | X | X | Govt (no fees)       |
| Ghana            | Lower-middle | ✓ | X | ✓ | Mix (govt + private) |
| Guinea           | Low          | ✓ | X | X | Govt (no fees)       |
| Kenya            | Lower-middle | ✓ | ✓ | ✓ | Govt (some fees)     |
| Liberia          | Low          | ✓ | X | X | Unknown              |
| Libya            | Upper-middle | ✓ | ✓ | ✓ | Mix (govt + private) |
| Madagascar       | Low          | ✓ | X | X | Private (OOP)        |
| Malawi           | Low          | ✓ | ✓ | X | Govt (no fees)       |
| Morocco          | Lower-middle | ✓ | ✓ | ✓ | Multiple             |
| Mozambique       | Low          | ✓ | ✓ | X | Govt (some fees)     |
| Namibia          | Upper-middle | ✓ | X | ✓ | Mix (govt + private) |
| Niger            | Low          | ✓ | X | X | Govt (some fees)     |

|               |                        |              |   |   |   |                      |
|---------------|------------------------|--------------|---|---|---|----------------------|
|               | Nigeria                | Lower-middle | ✓ | X | ✓ | Private (OOP)        |
|               | Senegal                | Lower-middle | ✓ | ✓ | X | Govt (some fees)     |
|               | Somalia                | Low          | ✓ | X | X | Private (OOP)        |
|               | South Africa           | Upper-middle | ✓ | ✓ | ✓ | Mix (govt + private) |
|               | Tunisia                | Upper-middle | ✓ | ✓ | ✓ | Mix (govt + private) |
|               | Uganda                 | Low          | ✓ | X | X | Mix (govt + private) |
|               | Zambia                 | Lower-middle | ✓ | ✓ | X | Govt (some fees)     |
| E&C<br>Europe | Albania                | Upper-middle | ✓ | ✓ | ✓ | Mix (govt + private) |
|               | Bosnia and Herzegovina | Upper-middle | ✓ | ✓ | ✓ | Mix (govt + private) |
|               | Bulgaria               | Upper-middle | ✓ | ✓ | ✓ | Govt (some fees)     |
|               | Croatia                | High         | ✓ | ✓ | ✓ | Govt (no fees)       |
|               | Cyprus                 | High         | ✓ | ✓ | ✓ | Govt (no fees)       |
|               | Czech Republic         | High         | ✓ | ✓ | ✓ | Govt (no fees)       |
|               | Estonia                | High         | ✓ | ✓ | ✓ | Govt (no fees)       |
|               | Hungary                | High         | ✓ | ✓ | ✓ | Govt (no fees)       |

|                  |                           |              |   |   |   |                         |
|------------------|---------------------------|--------------|---|---|---|-------------------------|
|                  | Kosovo                    | Lower-middle | ✓ | ✓ | X | Govt (no fees)          |
|                  | Latvia                    | High         | ✓ | ✓ | ✓ | Govt (no fees)          |
|                  | Macedonia,<br>FYR         | Upper-middle | ✓ | ✓ | ✓ | Govt (no fees)          |
|                  | Moldova                   | Lower-middle | ✓ | ✓ | ✓ | Govt (no fees)          |
|                  | Poland                    | High         | ✓ | ✓ | ✓ | Govt (no fees)          |
|                  | Romania                   | Upper-middle | ✓ | ✓ | ✓ | Govt (no fees)          |
|                  | Serbia                    | Upper-middle | ✓ | ✓ | ✓ | Govt (no fees)          |
|                  | Slovak<br>Republic        | High         | ✓ | ✓ | ✓ | Other                   |
|                  | Slovenia                  | High         | ✓ | ✓ | ✓ | Govt (no fees)          |
|                  | Turkey                    | Upper-middle | ✓ | ✓ | ✓ | Govt (no fees)          |
| Latin<br>America | Argentina                 | High         | ✓ | ✓ | ✓ | Mix (govt +<br>private) |
|                  | British Virgin<br>Islands | High         | ✓ | X | X | Govt (no fees)          |
|                  | Colombia                  | Upper-middle | ✓ | ✓ | ✓ | Multiple                |
|                  | Cuba                      | Upper-middle | ✓ | ✓ | ✓ | Govt (no fees)          |

|              |                      |              |   |   |   |                      |
|--------------|----------------------|--------------|---|---|---|----------------------|
|              | Dominican Republic   | Upper-middle | ✓ |   | ✓ | Govt (some fees)     |
|              | Haiti                | Low          | ✓ | X | ✓ | Private (OOP)        |
|              | Panama               | Upper-middle | ✓ | ✓ | ✓ | Mix (govt + private) |
|              | Paraguay             | Upper-middle | ✓ | ✓ | ✓ | Mix (govt + private) |
| Middle East  | Iran, Islamic Rep.   | Upper-middle | ✓ | ✓ | ✓ | Govt (no fees)       |
|              | Iraq                 | Upper-middle | ✓ | ✓ | ✓ | Govt (no fees)       |
|              | Jordan               | Upper-middle | ✓ | ✓ | ✓ | Govt (no fees)       |
|              | Kuwait               | High         | ✓ | ✓ | ✓ | Govt (no fees)       |
|              | Lebanon              | Upper-middle | ✓ | ✓ | ✓ | Govt (no fees)       |
|              | Oman                 | High         | ✓ | ✓ | ✓ | Govt (no fees)       |
|              | Qatar                | High         | ✓ | ✓ | ✓ | Govt (some fees)     |
|              | Saudi Arabia         | High         | ✓ | ✓ | ✓ | Govt (no fees)       |
|              | United Arab Emirates | High         | ✓ | ✓ | ✓ | Govt (no fees)       |
| NIS & Russia | Armenia              | Lower-middle | ✓ | X | ✓ | Govt (some fees)     |



|                     |                                |              |   |   |   |                      |
|---------------------|--------------------------------|--------------|---|---|---|----------------------|
|                     | Azerbaijan                     | Upper-middle | ✓ | ✓ | ✓ | Govt (no fees)       |
|                     | Georgia                        | Lower-middle | ✓ | ✓ | ✓ | Govt (no fees)       |
|                     | Tajikistan                     | Lower-middle | ✓ | X | ✓ | Other                |
| NAC                 | Canada                         | High         | ✓ | ✓ | ✓ | Govt (no fees)       |
|                     | Cayman Islands                 | High         | ✓ | ✓ | X | Mix (govt + private) |
|                     | Jamaica                        | Upper-middle | ✓ | ✓ | ✓ | Mix (govt + private) |
|                     | St. Lucia                      | Upper-middle | ✓ | X | X | Mix (govt + private) |
|                     | St. Vincent and the Grenadines | Upper-middle | ✓ | ✓ | X | Mix (govt + private) |
|                     | United States                  | High         | ✓ | ✓ | ✓ | Mix (govt + private) |
| North and East Asia | China                          | Upper-middle | ✓ | ✓ | ✓ | Govt (some fees)     |
|                     | Hong Kong SAR, China           | High         | ✓ | ✓ | ✓ | Mix (govt + private) |
|                     | Japan                          | High         | ✓ | ✓ | ✓ | Govt (some fees)     |
|                     | Korea, Rep.                    | High         | ✓ | ✓ | ✓ | Govt (some fees)     |

|      |                   |              |   |   |   |                      |
|------|-------------------|--------------|---|---|---|----------------------|
|      | Macao SAR, China  | High         | ✓ | ✓ | ✓ | Govt (some fees)     |
|      | Mongolia          | Upper-middle | ✓ | ✓ | ✓ | Govt (no fees)       |
|      | Taiwan, China     | High         | ✓ | ✓ | ✓ | Govt (some fees)     |
| OSEA | Australia         | High         | ✓ | ✓ | ✓ | Govt (no fees)       |
|      | Brunei Darussalam | High         | ✓ | ✓ | ✓ | Govt (no fees)       |
|      | Fiji              | Upper-middle | ✓ | ✓ | X | Mix (govt + private) |
|      | Indonesia         | Lower-middle | ✓ | ✓ | ✓ | Govt (some fees)     |
|      | Lao PDR           | Lower-middle | ✓ | X | X | Multiple             |
|      | Malaysia          | Upper-middle | ✓ | ✓ | ✓ | Mix (govt + private) |
|      | Myanmar           | Lower-middle | ✓ | ✓ | ✓ | Multiple             |
|      | New Caledonia     | High         | ✓ | ✓ | X | Govt (no fees)       |
|      | New Zealand       | High         | ✓ | ✓ | ✓ | Govt (no fees)       |
|      | Philippines       | Lower-middle | ✓ | ✓ | ✓ | Govt (some fees)     |

|                |             |              |   |   |   |                      |
|----------------|-------------|--------------|---|---|---|----------------------|
|                | Samoa       | Upper-middle | ✓ | X | X | Govt (some fees)     |
|                | Singapore   | High         | ✓ | ✓ | ✓ | Multiple             |
|                | Thailand    | Upper-middle | ✓ | ✓ | ✓ | Govt (some fees)     |
|                | Vietnam     | Lower-middle | ✓ | ✓ | ✓ | Govt (some fees)     |
| South Asia     | Afghanistan | Low          | ✓ | X | ✓ | Private (OOP)        |
|                | Bangladesh  | Lower-middle | ✓ | ✓ | ✓ | Multiple             |
|                | Bhutan      | Lower-middle | ✓ | ✓ | X | Govt (no fees)       |
|                | India       | Lower-middle | ✓ | ✓ | ✓ | Multiple             |
|                | Nepal       | Low          | ✓ | ✓ | ✓ | Govt (some fees)     |
|                | Pakistan    | Lower-middle | ✓ | ✓ | ✓ | Multiple             |
|                | Sri Lanka   | Lower-middle | ✓ | ✓ | ✓ | Mix (govt + private) |
| Western Europe | Austria     | High         | ✓ | ✓ | ✓ | Govt (no fees)       |
|                | Belgium     | High         | ✓ | ✓ | ✓ | Govt (no fees)       |
|                | Denmark     | High         | ✓ | ✓ | ✓ | Govt (no fees)       |
|                | France      | High         | ✓ | ✓ | ✓ | Govt (some fees)     |
|                | Greece      | High         | ✓ | ✓ | ✓ | Govt (no fees)       |

|                |      |   |   |   |                        |
|----------------|------|---|---|---|------------------------|
| Ireland        | High | ✓ | ✓ | ✓ | Govt (no fees)         |
| Israel         | High | ✓ | ✓ | ✓ | Govt (no fees)         |
| Italy          | High | ✓ | ✓ | ✓ | Govt (no fees)         |
| Liechtenstein  | High | ✓ | ✓ | X | Private<br>(insurance) |
| Luxembourg     | High | ✓ | ✓ | X | Govt (no fees)         |
| Malta          | High | ✓ | ✓ | ✓ | Govt (no fees)         |
| Netherlands    | High | ✓ | ✓ | ✓ | Govt (some fees)       |
| Norway         | High | ✓ | ✓ | ✓ | Govt (no fees)         |
| Portugal       | High | ✓ | ✓ | ✓ | Govt (no fees)         |
| Spain          | High | ✓ | ✓ | ✓ | Govt (no fees)         |
| Sweden         | High | ✓ | ✓ | ✓ | Govt (some fees)       |
| Switzerland    | High | ✓ | ✓ | ✓ | Govt (some fees)       |
| United Kingdom | High | ✓ | ✓ | ✓ | Govt (no fees)         |

✓ = Available    X = Not Available

**Govt (no fees)** = Government (no fees at point of delivery)

**Govt (some fees)** = Government (some fees at point of delivery)

**Mix (govt + private)** = Mix of government (public) and private

**Private (OOP)** = Private (solely out-of-pocket)

**Private (insurance)** = Private (solely health insurance)

**Multiple** = Multiple sources (programs provided by government, non-government organizations, and communities)

**Unknown** = Funding source not known/reported

**Other** = Other funding sources

E & C Europe = Eastern and Central Europe; ISN = international society of nephrology; KRT = kidney replacement therapy (dialysis and transplantation, excludes conservative kidney management); NAC = North America and the Caribbean; NIS = newly independent states; N & E Asia = North and East Asia

2 countries in Western Europe (Finland and Germany) reported “Unknown” for the availability of conservative kidney management. Both countries offer hemodialysis, peritoneal dialysis, and kidney transplantation. Finland reported that kidney replacement therapy was funded publicly with no fees at the point of care. German reported an “other” funding model.

**Supplemental Table 2.** Number of quality indicators of conservative kidney management delivery reported overall and by country income level.

| Income group | Number of indicators reported N (%) <sup>1</sup> |         |         |        |       |         | Total |
|--------------|--------------------------------------------------|---------|---------|--------|-------|---------|-------|
|              | 0                                                | 1       | 2       | 3      | 4     | 5       |       |
| Low          | 8 (44)                                           | 6 (33)  | 1 (6)   | 2 (11) | 1 (6) | 0 (0)   | 18    |
| Lower-middle | 11 (42)                                          | 3 (12)  | 6 (23)  | 3 (12) | 0     | 3 (12)  | 26    |
| Upper-middle | 10 (30)                                          | 9 (27)  | 5 (15)  | 2 (6)  | 1 (3) | 6 (18)  | 33    |
| High         | 4 (9)                                            | 11 (23) | 8 (17)  | 3 (6)  | 4 (9) | 17 (36) | 47    |
| Overall      | 33 (27)                                          | 29 (23) | 20 (16) | 10 (8) | 6 (5) | 26 (21) | 124   |

<sup>1</sup>Indicators were: 1) multidisciplinary teams; 2) shared decision-making; 3) symptom management; 4) psychological, cultural, spiritual support; and 5) healthcare provider training. % was calculated as the number of countries reporting an indicator divided by the total number of countries in that region that provide conservative kidney management. Row totals may not equal 100% due to rounding.
